# Supplementary material for: The PAR complex controls the spatiotemporal dynamics of F-actin and the MTOC in directionally migrating leukocytes
Source: PubMed Central journal article supplement (PMC4197085; doi:10.1242/jcs.146217), 2014-10-15
Supplement: supp_127.20.4381_JCS146217.pdf [file supp_127.20.4381_JCS146217.pdf]

1 **SUPPLEMENTARY FIGURES**

2

3 **SUPPLEMENTARY FIGURE LEGENDS**

4 **Fig. S1. Transient expression of transgenes in myeloid cells *in vivo*, related to Fig. 1. (A)**

5 Sudan black (SB) staining of zebrafish MPO::GFP (left panel) or medaka FmpoP::memYFP

6 larvae (right panel), respectively at 3 or 11dpf. White arrows indicate GFP<sup>+</sup> SB<sup>+</sup> (left panel) or

7 memYFP<sup>+</sup> SB<sup>+</sup> (right panel) leukocytes. Scale bars = 20 μm. **(B)** Outline of the experimental

8 strategy used to co-express two transgenes in medaka myeloid cells. *Wild-type Cab* embryos

9 were injected at the one-cell stage with a 1:1 mixture of DNA coding for H2AmCherry as a

10 nuclear reporter and membrane-tethered YFP, driven by the myeloid cell-specific *Fmpo*

11 promoter and flanked by I-SceI integration sites (Sc), in the presence of I-SceI meganuclease.

12 **(C)** Top, illustration of the location in the fish larval tailfin imaged for the analysis of

13 coexpression of two transgenes in live myeloid cells. Bottom, representative images of larvae

14 containing single (YFP<sup>+</sup>; Cherry<sup>+</sup>) and double (YFP<sup>+</sup> Cherry<sup>+</sup>) positive cells within the region

15 highlighted. Scale bar = 50 μm. **(D)** Quantification of the degree of coexpression of two

16 transgenes (YFP<sup>+</sup> Cherry<sup>+</sup> - gray bar) in live myeloid cells. Data are expressed as means ± s.e.m.

17 of three independent experiments (173 leukocytes from 3 separate larvae). **(E)** Top, schematics

18 of the reporter construct used to express mCherry and memYFP linked by a self-cleavable viral

19 P2A peptide in medaka myeloid cells. Bottom, independent expression of mCherry and

20 memYFP protein products in medaka leukocytes from the mCherry-P2A-memYFP transgene.

21 Scale bar = 20 μm. **(F)** Schematics of the constructs used to express mCherry and PKC-ζ

22 variants linked by a self-cleavable viral P2A peptide in medaka myeloid cells. **(G and H)**

23 Quantitation of 2D **(G)** path straightness and **(H)** directional speed ratio (Vy/Vx) of mCherry-

24 P2A<sup>+</sup> PKC-ζ<sup>+</sup> myeloid cells during the wound response. Data are expressed as means ± s.e.m. of

25 at least two separate experiments (PKC-ζ-WT: n = 30 cells in 2 larvae, PKC-ζ-KW: n = 53 cells

26 in 4 larvae; \* p < 0.05, two-tailed unpaired Student's t-test).

27

28 **Fig. S2. F-actin anteroposterior polarity in live myeloid cells correlates with cell speed,**

29 **related to Fig. 2. (A)** Top panel, one cycle of front-rear F-actin waves is visualized in wounded

30 TG(FmpoP::memYFP) larvae co-expressing transiently RFP-Lifeact and PKC-ζ-WT in myeloid

31 cells. Shown are frames taken at the indicated times from representative movies of migrating

32 leukocytes in the wounded tailfin. The white arrows indicate direction of migration. Scale bar =  
33 10  $\mu\text{m}$ . Bottom panel, time profile of cell's speed. Black dots correspond to the indicated time  
34 points. **(B)** Fluorescence signal distribution of F-actin in “back” and “front” regions of the cell  
35 at each time point  $t_i$  is plotted against cellular speed (determined using the positions at  $t_{i-1}$  and  $t_{i+1}$   
36 as described in the Materials and Methods). For each range of speed, data represents means  $\pm$   
37 s.e.m. (521 counts, 16 leukocytes from 3 larvae; Back: Spearman  $r = 0.61$ , Front: Spearman  $r = -$   
38  $0.57$ , \*\*\*\*  $p$  (two-tailed)  $< 0.0001$ ). **(C)** Fluorescence signal distribution in **(B)** is normalized to  
39 memYFP intensity levels and plotted against cellular speed. For each range of speed, data  
40 represents means  $\pm$  s.e.m. (Back: Spearman  $r = 0.69$ , Front: Spearman  $r = -0.67$ , \*\*\*\*  $p$  (two-  
41 tailed)  $< 0.0001$ ).

42

43 **Fig. S3. MTOC and nucleus dynamics in myeloid cells migrating to wounds *in vivo*, related**  
44 **to Figs. 3,6.** **(A)** Average positions of the nucleus (blue) and MTOC (green) relative to the cell  
45 centroid (defined as “0”) in migrating myeloid cells. Position was normalized to cell radius  
46 calculated based on the Feret diameter (left) or based on the length of the major axis from the  
47 best fitting ellipse (right). Data represents means  $\pm$  s.e.m. of all events analyzed (296 counts, 9  
48 leukocytes from 5 larvae; \*\*\*\*  $p < 0.0001$  two-tailed paired Student's t test). **(B)** Schematics of  
49 2D analysis on MTOC and nucleus orientation during cell migration. The dashed red arrow  
50 indicates the direction of migration defined as in Fig. 2. The green arrow from the geometric  
51 center of the cell (black dot) to the MTOC is the MTOC vector whereas the blue arrow from the  
52 geometric center of the cell to the geometric center of the nucleus (white dot) is the nucleus  
53 vector. The angle  $\alpha$  between the MTOC vector and the direction of migration vector is defined  
54 here as the MTOC angle (green arc) while the angle  $\beta$  between the nucleus vector and the  
55 direction of migration vector is defined here as the nucleus angle (blue arc). **(C)** Rose diagram  
56 mapping MTOC (left) or nucleus (right) orientation and the respective spatial frequency in  
57 migrating myeloid cells during wound-response (MTOC: 307 counts, Nucleus: 309 counts, 10  
58 leukocytes from 5 larvae). Gray areas indicate “front” or “back” orientation as in Fig. 3. **(D)**  
59 Quantification of MTOC and nucleus angular mobility in migrating myeloid cells. Angular  
60 mobility of the MTOC or the nucleus *per cell* is calculated as in Fig. 3. Red lines represent  
61 means  $\pm$  s.e.m. for all cells analyzed (10 leukocytes from 5 separate larvae; two-tailed paired  
62 Student's t test). **(E)** Schematics of 2D analysis on nucleus anteroposterior (A-P) positioning

63 during cell migration. The black line is the cell length and represents the orthogonal projection  
64 of the cell onto the direction of migration axis (dashed red arrow). The orthogonal projection of  
65 the nuclear centroid onto the cell length is defined here as the nucleus A-P position (yellow  
66 asterisk) and it approaches the value 1 when the nucleus is positioned at the “back” of the cell.  
67 **(F)** MTOC perinuclear orientation and A-P nuclear positioning are plotted against F-actin  
68 fluorescence signal distribution in the “back” region of the cell. For each range of “back” F-  
69 actin distribution, data represents means  $\pm$  s.e.m. (A-P Nucleus vs ”Back” F-actin - Counts: 383,  
70 Spearman  $r = -0.1595$ , \*\*  $p$  (two-tailed) = 0.0017; Angle MTOC/Nucleus vs ”Back” F-actin -  
71 Counts: 271; Spearman  $r = 0.2165$ , \*\*\*\*  $p$  (two-tailed) = 0.0003). See also Materials and  
72 Methods.

73

74 **Fig. S4. PAR complex regulates cellular morphology in leukocytes migrating to wounds *in***  
75 ***vivo*, related to Figs. 4,5. (A)** Morphology of representative single myeloid cells migrating in  
76 the fish larval tailfin towards a wound. Shown are outlines of myeloid cell morphology over  
77 time (CTR: 10.25 minutes; PKC- $\zeta$ -WT: 12.25 minutes; PKC- $\zeta$ -KW: 15.25 minutes; PAR-6-NT:  
78 9.25 minutes; PAR-3-aPKCBBR: 19.25 minutes). The black arrows indicate direction of  
79 migration. Scale bar = 20  $\mu$ m. **(B)** Histograms show the distribution of roundness values in  
80 migrating cells (CTR: 295 counts, 9 leukocytes from 5 larvae; PKC- $\zeta$ -WT: 293 counts, 8  
81 leukocytes from 5 larvae; PKC- $\zeta$ -KW: 384 counts, 8 leukocytes from 6 larvae; PAR-6-NT: 279  
82 counts, 8 leukocytes from 5 larvae; PAR-3-aPKCBBR: 400 counts, 8 leukocytes from 5 larvae).  
83 **(C)** Quantification of cellular roundness in migrating myeloid cells. Data represents means  $\pm$   
84 s.e.m. for all events analyzed in **(B)**. For statistical analysis see also supplementary material  
85 Table S2.

# Fig. S1

A

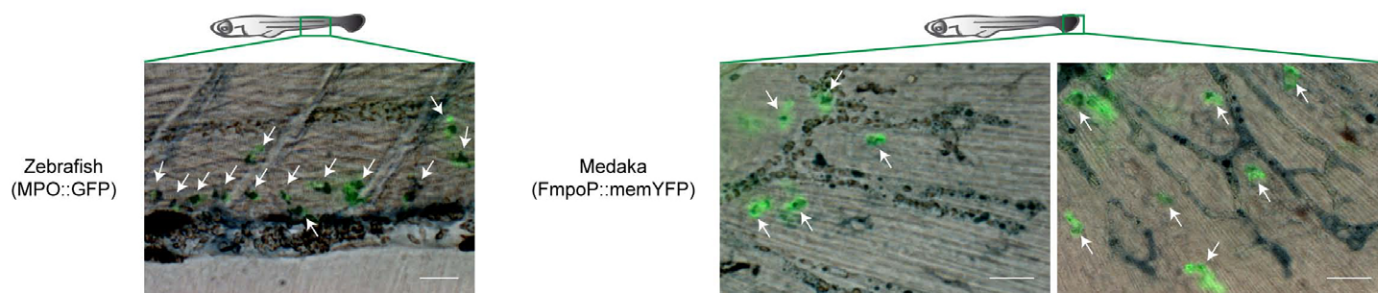

B

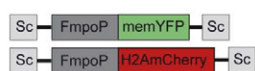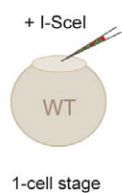

C

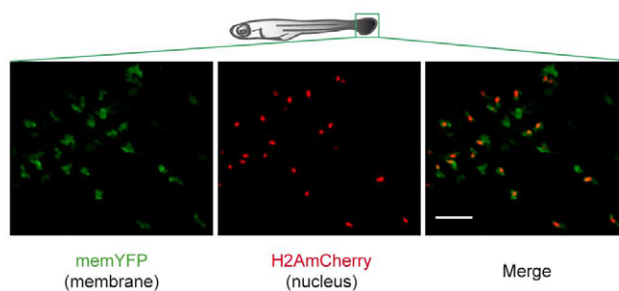

D

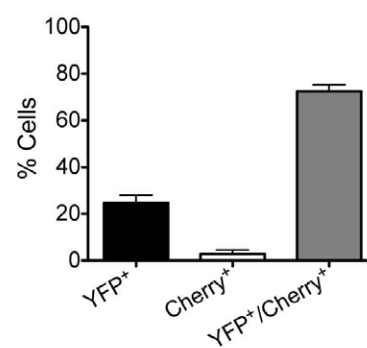

E

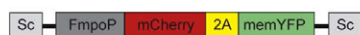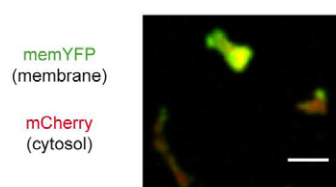

F

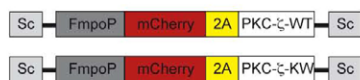

G

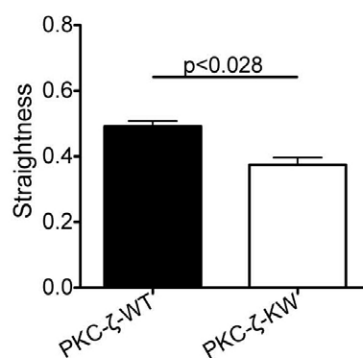

H

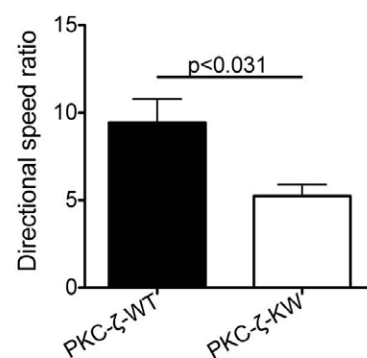

# Fig. S2

## A

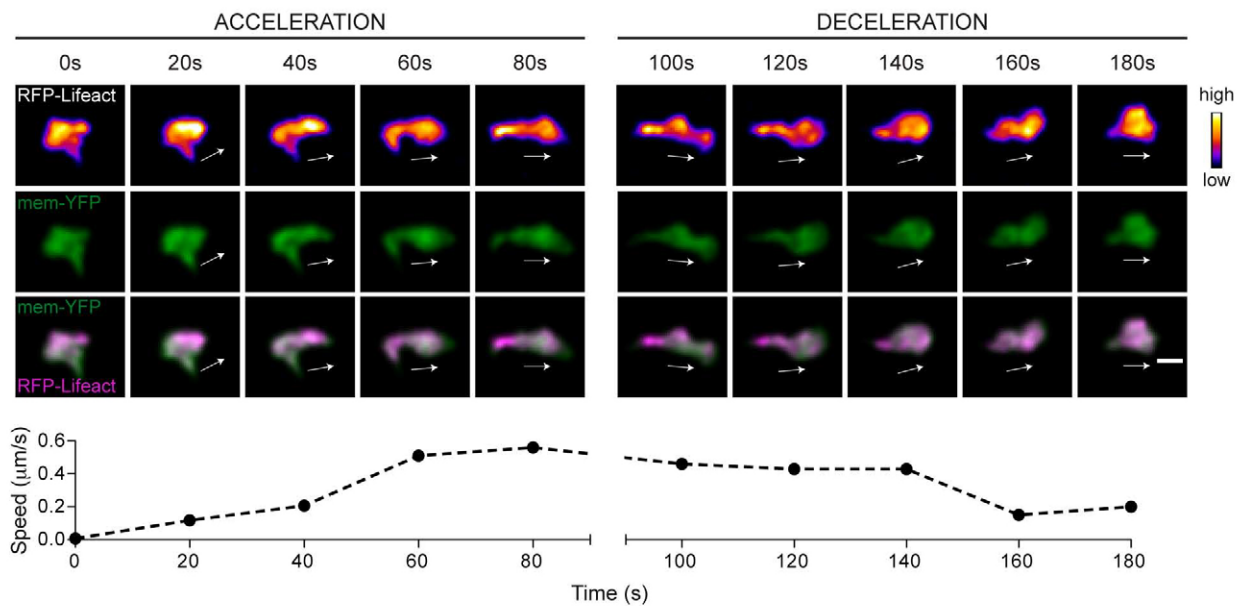

## B

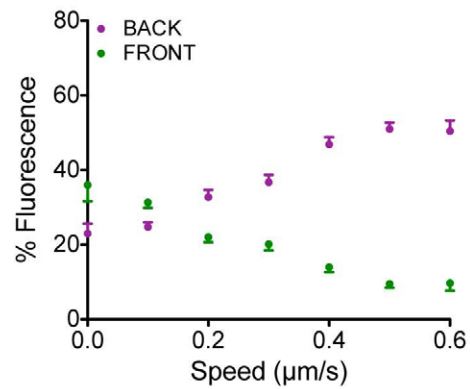

## C

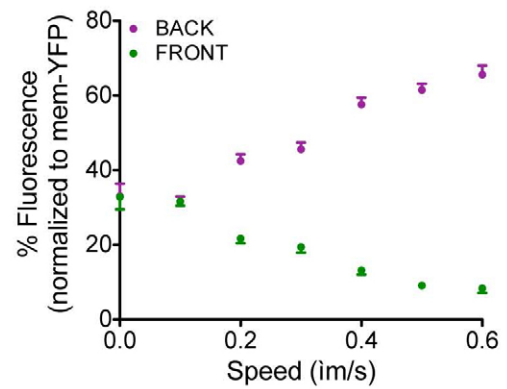

**Fig. S3**

**A**

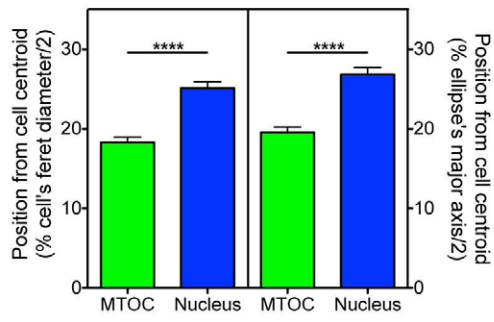

**B**

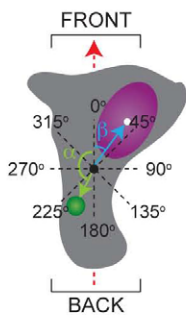

**C**

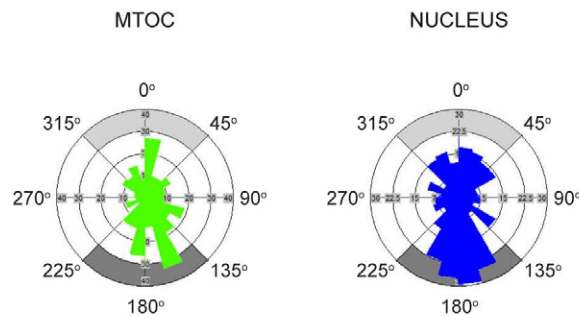

**D**

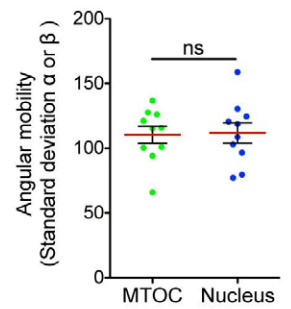

**E**

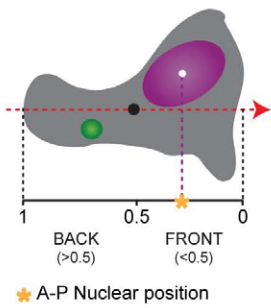

**F**

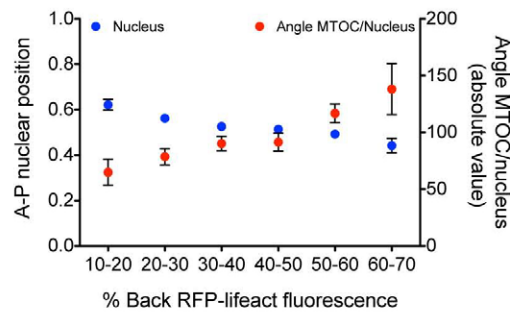

# Fig. S4

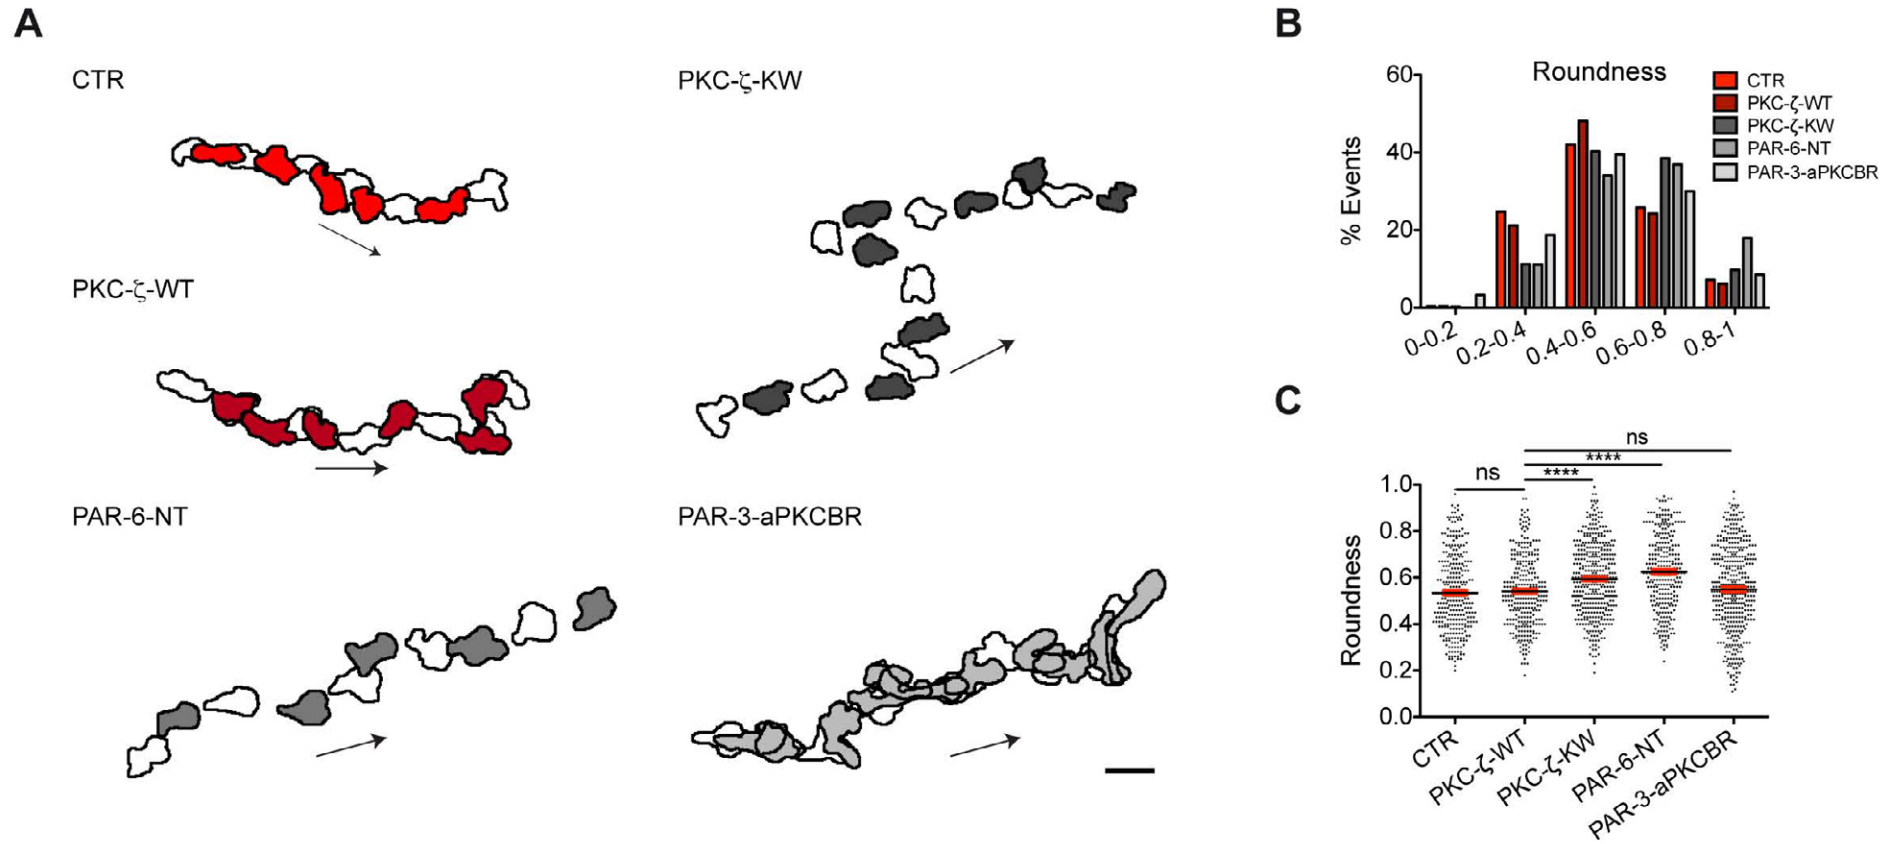

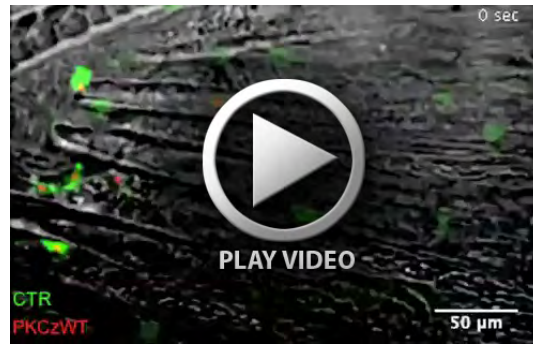

**Movie 1. Effects of PKC- $\zeta$ -WT expression on myeloid cell migration to a tailfin wound.** Wounding response in 11dpf TG(FmpoP::memYFP) transgenic larva co-expressing nuclear H2AmCherry and PKC- $\zeta$ -WT in memYFP<sup>+</sup> leukocytes. YFP (green), Cherry (red) images were obtained every 20 s with a spinning-disk confocal microscope. The wound is located on the bottom right hand side of the movie. Frame rate: 15 fps.

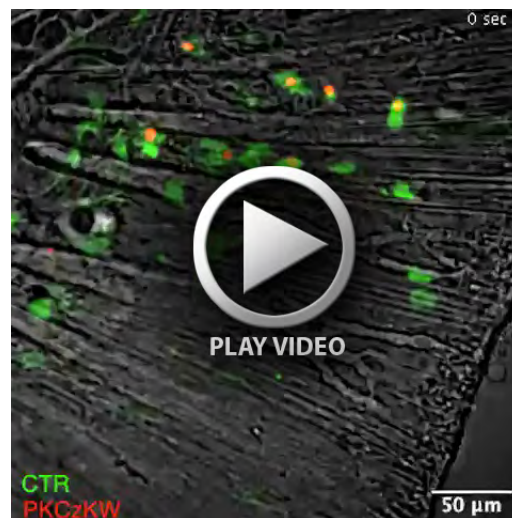

**Movie 2. Effects of PKC- $\zeta$ -KW expression on myeloid cell migration to a tailfin wound.** Wounding response in 11dpf TG(FmpoP::memYFP) transgenic larva co-expressing nuclear H2AmCherry and PKC- $\zeta$ -KW in memYFP<sup>+</sup> leukocytes. YFP (green), Cherry (red) images were obtained every 20.8 s with a spinning-disk confocal microscope. The wound is located on the bottom right hand side of the movie. Frame rate: 15 fps.

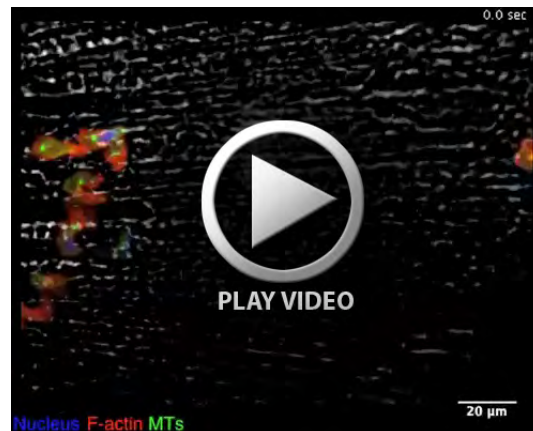

**Movie 3. Imaging of cytoskeletal dynamics during wound-response.** Wounding response in 9dpf TG(FmpoP::EB3-EGFP/FmpoP::RFP-Lifeact) transgenic larvae expressing nuclear H2B-CFP in myeloid cells. CFP (blue), GFP (green), RFP (red) images were obtained with a spinning-disk confocal microscope. The wound is located on the right hand side of the movie. Individual frames acquired every 16.5 s. Frame rate: 12 fps.



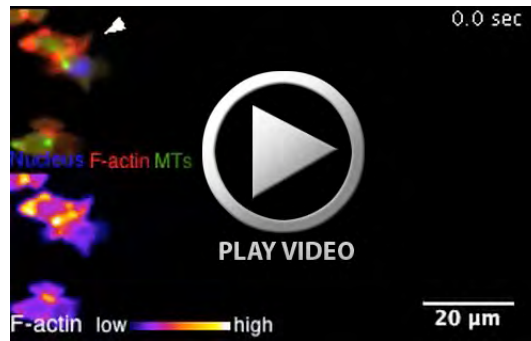

**Movie 4. F-actin dynamics in leukocytes moving to wounds.** F-actin dynamics of representative myeloid cells during wound-response. CFP (blue), GFP (green), RFP (red) images were obtained with a spinning-disk confocal microscope. A pseudo-color image of RFP-Lifeact was used to map intensity levels of F-actin. Blue to yellow denote low to high intensities, respectively. Wounds are located on the right hand side of the movie. (A) Individual frames acquired every 16.5 s. (B) Individual frames acquired every 8.4 s. Frame rate: 6 fps.

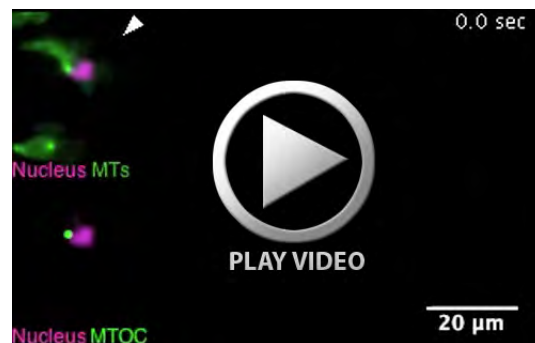

**Movie 5. MTOC repositioning in leukocytes moving to wounds.** MTOC positioning in the perinuclear region of cells from Movie 4. CFP (magenta), GFP (green) images were obtained with a spinning-disk confocal microscope. A digitalized reconstruction of the MTOC position (green dot) was created to illustrate MTOC orientation around the nucleus (magenta). Frame rate: 6 fps.

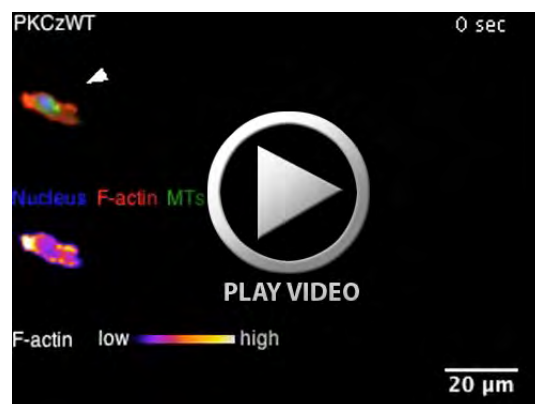

**Movie 6. Effect of PAR mutants on F-actin dynamics.** F-actin dynamics of representative wound-activated myeloid cells expressing PKC- $\zeta$ -WT or the different PAR-mutants. CFP (blue), GFP (green), RFP (red) images were obtained every 15-18 s with a spinning-disk confocal microscope. A pseudo-color image of RFP-Lifeact was used as in Movie 4. Wounds are located on the right hand side of the movie. Frame rate: 6 fps.

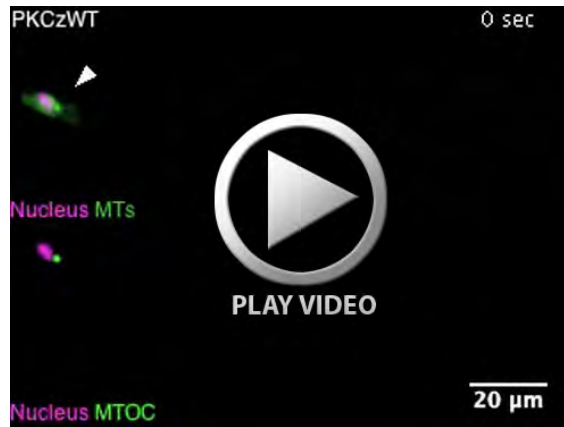

**Movie 7. Effect of PAR mutants on MTOC mobility.** MTOC positioning in the perinuclear region of leukocytes from Movie 6. CFP (magenta), GFP (green) images were obtained every 15-18 s with a spinning-disk confocal microscope. A digitalized reconstruction of the MTOC position (green dot) was created as in Movie 5. Frame rate: 6 fps.

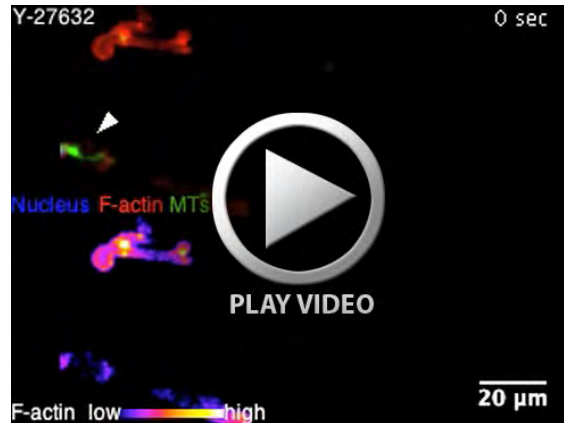

**Movie 8. Perturbation of Rho signaling on F-actin dynamics.** F-actin dynamics of wound-activated myeloid cells treated with Y-27632 (500  $\mu$ M). CFP (blue), GFP (green), RFP (red) images were obtained every 15 s with a spinning-disk confocal microscope. A pseudo-color image of RFP-Lifeact was used as in Movie 4. Wounds are located on the right hand side of the movie. Frame rate: 6 fps.

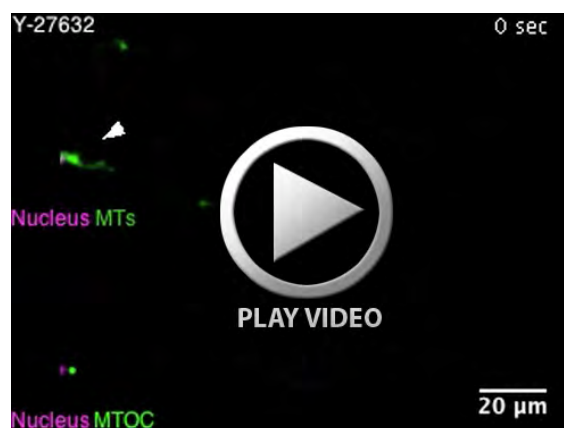

**Movie 9. Perturbation of Rho signaling on MTOC dynamics.** MTOC positioning in the perinuclear region of leukocytes from Movie 8. CFP (magenta), GFP (green) images were obtained every 15 s with a spinning-disk confocal microscope. A digitalized reconstruction of the MTOC position (green dot) was created as in Movie 5. Frame rate: 6 fps.

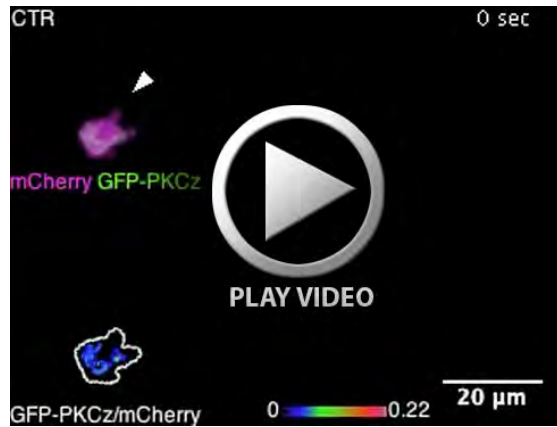

**Movie 10. Effect of Rho-kinase inhibition on GFP-PKC- $\zeta$  polarity.** GFP-PKC- $\zeta$  polarization in representative myeloid cells migrating to a wound in control or Y-27632-treated TG(FmpoP::mCherry) transgenic larvae, at 9dpf. GFP (green) and Cherry (magenta) images were obtained every 15 s with a spinning-disk confocal microscope. Ratio images of GFP/Cherry were generated to reveal increases in GFP-PKC- $\zeta$  fluorescence intensities. Blue to red colors denote low to high ratio values, respectively. Wounds are located on the right hand side of the movie. Frame rate: 5 fps.

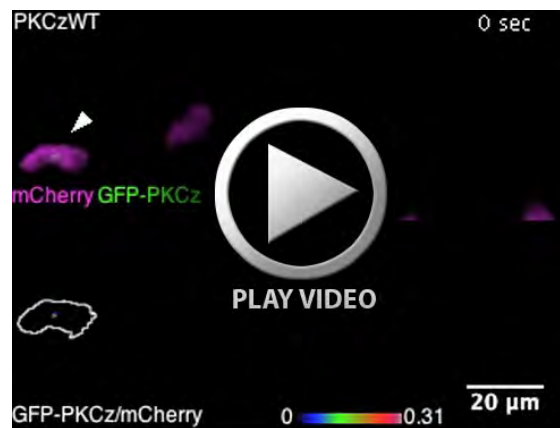

**Movie 11. Perturbation of PKC- $\zeta$  activity on GFP-PKC- $\zeta$  ‘front’ polarity.** GFP-PKC- $\zeta$  polarization in representative wound-activated myeloid cells expressing PKC- $\zeta$ -WT or PKC- $\zeta$ -KW in 9dpf TG(FmpoP::mCherry) transgenic larvae. GFP (green) and Cherry (magenta) images were obtained every 15 s with a spinning-disk confocal microscope. Ratio images of GFP/Cherry were generated as in Movie 10. Wounds are located on the right hand side of the movie. Frame rate: 5 fps.

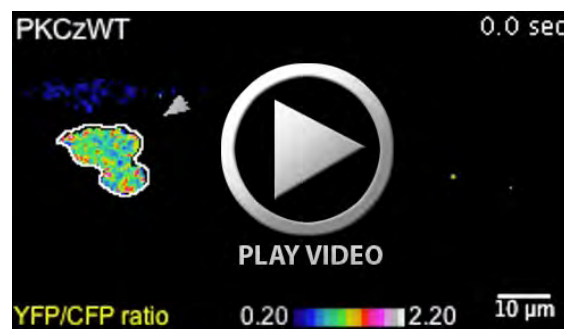

**Movie 12. Effect of PKC- $\zeta$  enzymatic function on RhoA activity.** RhoA activity in migrating myeloid cells co-expressing the cytosolic RhoA-FRET biosensor and PKC- $\zeta$ -WT or PKC- $\zeta$ -KW in 9dpf TG(FmpoP::mCherry) transgenic larvae. Ratio images of YFP/CFP are shown to reveal the average activation level of RhoA. Blue to white denote low to high ratio values, respectively. Wounds are located on the right hand side of the movie. Frame rate: 4 fps.

## SUPPLEMENTARY TABLES

**Table S1 - Summary of angle MTOC/Nucleus statistics.**

| Samples                  | Front/Back Bias |      | Deviation from random |   | Comparison (Watson test)                                              |
|--------------------------|-----------------|------|-----------------------|---|-----------------------------------------------------------------------|
|                          | Front           | Back | Rayleigh test         |   |                                                                       |
|                          | %               | %    |                       |   |                                                                       |
| CTR                      | 27.4            | 33.9 | 0.213                 | - |                                                                       |
| PKC- $\zeta$ -WT         | 29.1            | 38.1 | 0.012                 | - | PKC- $\zeta$ -WT vs CTR: $p > 0.5$ (similar)                          |
| PKC- $\zeta$ -KW         | 48.1            | 16.4 | $<10^{-12}$           | + | PKC- $\zeta$ -KW vs PKC- $\zeta$ -WT: $p < 0.001$ (different)         |
| PAR-6-NT                 | 53.2            | 11.1 | $<10^{-12}$           | + | PAR-6-NT vs PKC- $\zeta$ -WT: $p < 0.001$ (different)                 |
| PAR-3-aPKC <sub>BR</sub> | 47.7            | 17.4 | $<10^{-12}$           | + | PAR-3-aPKC <sub>BR</sub> vs PKC- $\zeta$ -WT: $p < 0.001$ (different) |
| Y-27632                  | 60.9            | 10.7 | $<10^{-12}$           | + | Y-27632 versus CTR: $p < 0.001$ (different)                           |

In the Rayleigh test for uniformity of directional data, the degree of deviation from random is given (Mardia and Jupp, 2000). Results of the Rayleigh test are displayed on a scale from random (-) to not at all random (+). In the Watson two-sample test for homogeneity of two samples of circular data, the higher the p-value, the more similar the populations (Mardia and Jupp, 2000).

**Table S2 - Summary of roundness statistics.**

| Samples          | Mean<br>± SD     | Comparison                              | Means<br>(Unpaired t test) |                     | Homogeneity of Variances<br>(Levene's test) |                     |
|------------------|------------------|-----------------------------------------|----------------------------|---------------------|---------------------------------------------|---------------------|
|                  |                  |                                         | p value                    | p-value<br>summary  | p value                                     | p-value summary     |
| CTR              | 0.535<br>± 0.171 |                                         |                            |                     |                                             |                     |
| PKC- $\zeta$ -WT | 0.540<br>± 0.153 | PKC- $\zeta$ -WT vs CTR                 | p=0.6950                   | ns<br>(similar)     | p=0.0149                                    | *<br>(different)    |
| PKC- $\zeta$ -KW | 0.594<br>± 0.157 | PKC- $\zeta$ -KW vs<br>PKC- $\zeta$ -WT | p<0.0001                   | ****<br>(different) | p=0.2400                                    | ns<br>(similar)     |
| PAR-6-NT         | 0.624<br>± 0.165 | PAR-6-NT vs PKC-<br>$\zeta$ -WT         | p<0.0001                   | ****<br>(different) | p=0.0732                                    | ns<br>(similar)     |
| PAR-3-<br>aPKCBR | 0.549<br>± 0.187 | PAR-3-aPKCBR vs<br>PKC- $\zeta$ -WT     | p=0.4957                   | ns<br>(similar)     | p<0.0001                                    | ****<br>(different) |

**SUPPLEMENTARY REFERENCES**

**Mardia, K. V. and Jupp, P. E.** (2000). Directional Statistics. *John Wiley and Sons, Inc.* 1–429.
